# Supplementary material
Source: HighWire-hosted journal article supplement (https://www.cmaj.ca/highwire/filestream/58496/field_highwire_adjunct_files/0/pg963.pdf)
Supplement: pg963.pdf [file pg963.pdf]

## Santé publique, persuasion publique

Cette année, c'est le 200<sup>e</sup> anniversaire de naissance d'Edwin Chadwick, dont le *Report on the Sanitary Conditions of the Labouring Populations* a été le précurseur de la première Loi sur la santé publique de la Grande-Bretagne, qui a été adoptée en 1848.<sup>1</sup> Vivant à une époque où la société évoluait rapidement — la population de l'Angleterre et du Pays de Galles était en train de doubler : elle est passée de 9 millions d'habitants en 1801 à 18 millions en 1850 — Chadwick a été témoin du cauchemar à la Dickens qui a accompagné la révolution industrielle. Même si ce n'est que vers les années 1880 que la «théorie des germes» a produit une explication rationnelle des maladies infectieuses, les médecins et les réformateurs sociaux de l'époque de Chadwick ont reconnu que l'état de santé d'une population est lié à des facteurs de l'environnement comme l'eau propre, des conditions de travail sécuritaires et un logement décent.

Même si Chadwick a fondé son rapport sur des données épidémiologiques réunies par des agents désignés en vertu de la Poor Law, des médecins et d'autres personnes, il a supprimé certaines données et a mis l'accent sur certaines autres afin d'appuyer son «concept sanitaire» — selon lequel les efforts d'éradication d'une maladie doivent passer d'abord par des améliorations des réseaux d'aqueduc et d'égout et la gestion des déchets.<sup>1</sup> Or, si le rapport visait à contourner l'idée plus radicale et inacceptable sur le plan politique selon laquelle la pauvreté était la cause profonde de la maladie,<sup>1</sup> il a aussi démontré que la réussite d'initiatives de santé publique repose non seulement sur des données, mais aussi sur l'art de la persuasion.

Depuis l'époque de Chadwick, nous avons adopté de nouveaux modèles sur la santé et la maladie et, par conséquent, de nouvelles façons d'aborder la santé publique. Nous avons eu tendance à espérer que les solutions techniques suffiraient à elles seules. Nous avons parfois été victimes de notre propre succès : dans les pays où les épidémies de certaines maladies infectieuses infantiles ne sont plus que souvenir, il devient de nouveau nécessaire de

«vendre» à la population la nécessité de la vaccination générale. Comme à l'époque de Chadwick, nous sommes témoins de vastes perturbations sociales qui mettront à l'épreuve les limites de la santé publique. L'échange plus libre de biens autour de la planète, les voyages internationaux qui se multiplient, la dégradation de l'environnement et le déplacement des populations par les conflits armés obligeront à mieux surveiller les maladies, à innover dans les politiques publiques et à resserrer la coopération internationale. L'Organisation mondiale de la santé, par exemple, est sur le point d'atteindre son but, qui est d'éradiquer la polio d'ici à la fin de l'an 2000. Pour ce faire, il faut toutefois passer par un processus politique intimidant qui consiste à négocier des «jours de tranquillité» dans les zones de guerre afin que l'on puisse vacciner les enfants des régions où persistent encore des réservoirs du virus sauvage de la polio.<sup>2</sup>

Au Canada, les défis que nous devons relever vont du banal à l'exotique. Les compressions budgétaires ont eu une incidence disproportionnée sur la prestation des services de santé publique, tandis que la déclaration de cas de paludisme au Canada<sup>3</sup> et les premières éclosions de fièvre à virus West-Nile signalées en Amérique du Nord (voir page 1036) nous rappellent que des maladies tropicales que nous connaissons peu sévissent à quelques heures d'avion à peine. Nous avons besoin autant qu'à l'époque de Chadwick de bons systèmes de surveillance de la santé publique et de prestation de services. Le plus important, toutefois, c'est que nous avons besoin d'un leadership solide et de la volonté de mettre en œuvre l'art de la persuasion du public. — *JAMC*

### Références

1. Hamlin C. *Public health and social justice in the age of Chadwick: Britain, 1800–1854*. Cambridge (Royaume-Uni) : Cambridge University Press; 1998.
2. Hull HF. Fighting stops for polio immunization. [www.who.int/inf/polio.html](http://www.who.int/inf/polio.html) (consulté le 7 mars 2000).
3. MacLean JD, Ward BJ. The return of swamp fever: malaria in Canadians. *JAMC* 1999;160(2):211-2. Disponible à l'adresse : [www.cma.ca/cmaj/vol-160/issue-2/0211.htm](http://www.cma.ca/cmaj/vol-160/issue-2/0211.htm)
